# Supplementary material for: Efficient Catalytic Degradation of Methyl Orange by Various ZnO-Doped Lignin-Based Carbons
Source: MDPI journal article supplement (doi:10.3390/molecules29081817), 2024-04-17
Supplement: s1 [file s1]

# **Efficient catalytic degradation of methyl orange by Various ZnO-doped lignin-based carbons**

Zhihao Tang<sup>1</sup>, Yonggang Yang<sup>2</sup> and Weiqi Wei<sup>1,2,\*</sup>

<sup>1</sup> Jiangsu Co-Innovation Center of Efficient Processing and Utilization of Forest Resources,

Nanjing Forestry University, Nanjing 210037, China ; tangzhihao@njfu.edu.cn

<sup>2</sup> School of Environmental & Resource Science, Shanxi University, Taiyuan 030006,

China; m18352353192@163.com

\* Correspondence: wqwei@njfu.edu.cn (Weiqi Wei)

**Table S1.** The specific surface area, total pore volume and average pore diameter of ZnO and LC<sub>AL</sub>/ZnO, LC<sub>OL</sub>/ZnO and LC<sub>SL</sub>/ZnO.

| <b>Sample Name</b>    | <b>BET surface area<br/>(m<sup>2</sup>/g)</b> | <b>Total pore volume<br/>(cm<sup>3</sup>/g)</b> | <b>Average pore diameter<br/>(nm)</b> |
|-----------------------|-----------------------------------------------|-------------------------------------------------|---------------------------------------|
| ZnO                   | 24.8436                                       | 10.061295                                       | 28.2653                               |
| LC <sub>AL</sub> /ZnO | 52.5159                                       | 10.114030                                       | 16.3155                               |
| LC <sub>OL</sub> /ZnO | 64.4977                                       | 20.134970                                       | 17.4985                               |
| LC <sub>SL</sub> /ZnO | 79.6220                                       | 30.042036                                       | 6.8782                                |

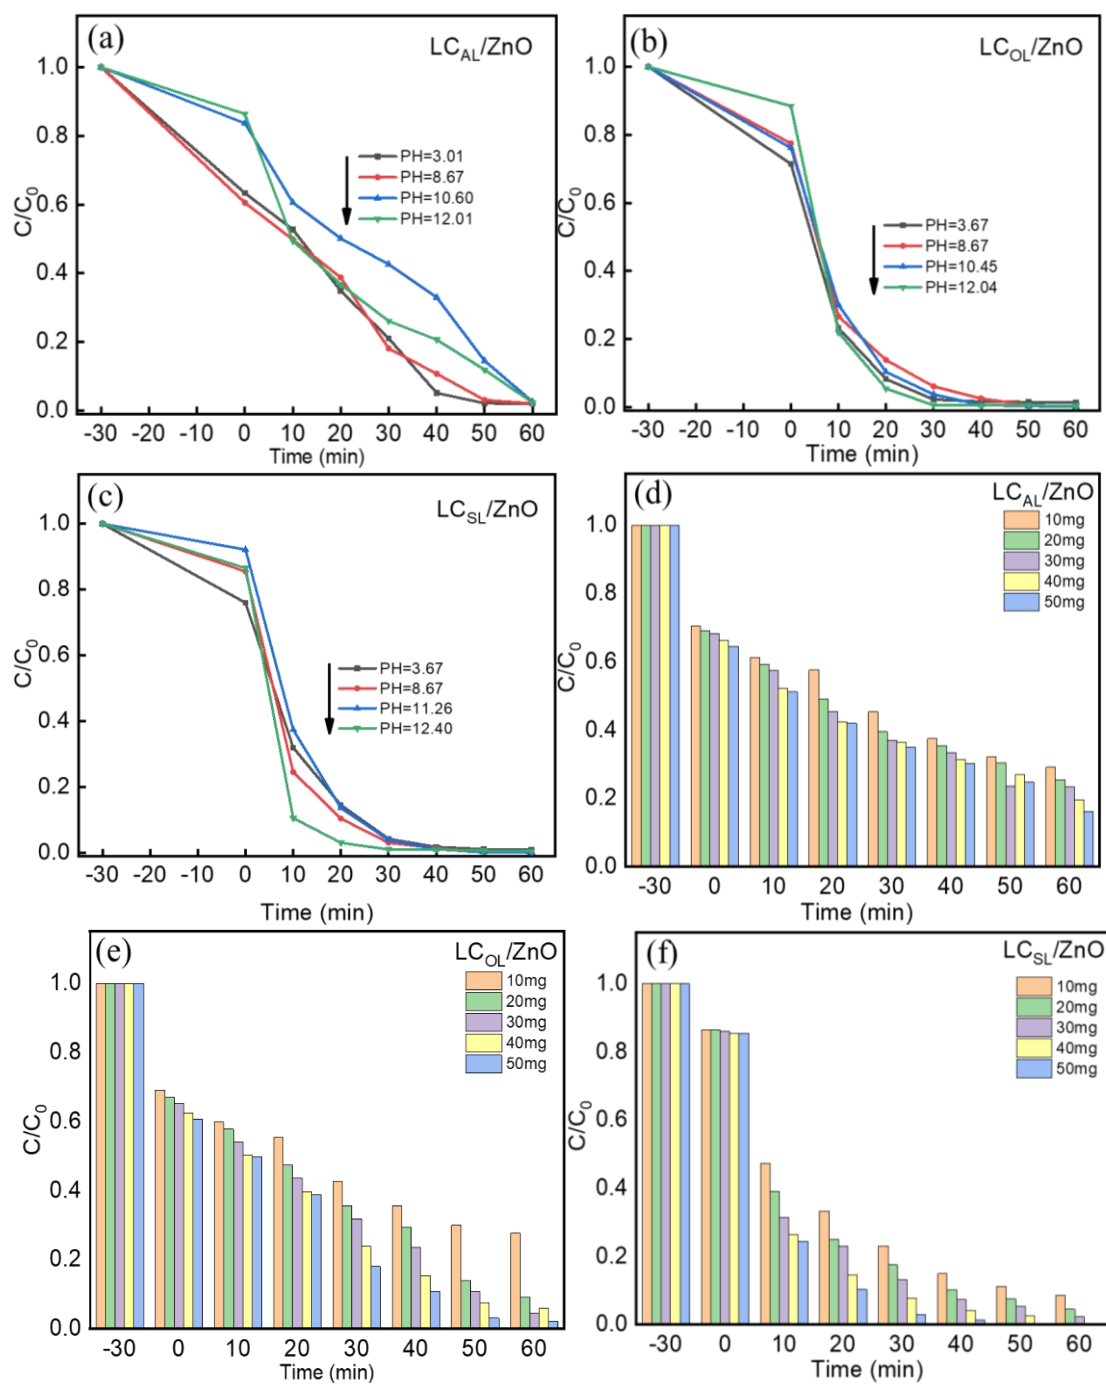

Figure S1. The effect of pH (a b & c) and catalyst dosage (d e & f) on MO photodegradation.
